# Supplementary material
Source: Springer Nature journal article supplement (https://www.springermedizin.de/resource/supplementary/12877_2013_1088_MOESM1_ESM.docx/9440812)
Supplement: MOESM1 [file 9440812]

**Table 1 Assessment instruments**

**Instrument T0 T1 T2**

Baseline variables X

**Patient** Mini Mental State Examination X X X

Neuropsychiatric Inventory X X X

Cohen-Mansfield Agitation Inventory X X X

Cornell Scale for Depression in Dementia X X X

Quality of life in Alzheimer’s disease X X X

Charlson Index X

Psychotropic drug use X X X

**Informal** Center for Epidemiological Studies

**Caregiver** Depression Scale X X X

General Health Questionnaire X X X

Quality of life (EQ-5D) X X X

Sense of Competence X X X
